# 1 Identification and quantification of chimeric sequencing reads 2 in a highly multiplexed RAD-seq protocol

3 Maria Luisa Martin Cerezo<sup>1,2\*</sup>, Rohan Raval<sup>1</sup>, Bernardo de Haro Reyes<sup>1</sup>, Marek Kucka<sup>3</sup>,  
4 Frank Yingguang Chan<sup>3</sup> and Jarosław Bryk<sup>1\*</sup>

5  
6 <sup>1</sup>Department of Biological and Geographical Sciences, School of Applied Sciences, Univer-  
7 sity of Huddersfield, Queensgate, Huddersfield, England, United Kingdom

8 <sup>2</sup>AVIAN Behavioural Genomics and Physiology, IFM Biology (IFM), Linköping University,  
9 Linköping, Sweden

10 <sup>3</sup>Friedrich Meschier Laboratory of the Max Planck Society, Tübingen, Germany

11  
12 \* E-mail: [mlmcerezo@gmail.com](mailto:mlmcerezo@gmail.com), [j.bryk@hud.ac.uk](mailto:j.bryk@hud.ac.uk)

## 14 Abstract

15 Highly multiplexed approaches have become a common practice in genomic studies. They have  
16 improved the cost-effectiveness of genotyping hundreds of individuals by using combinatorially-  
17 barcoded adapters. These strategies, however, can potentially misassign reads to incorrect sam-  
18 ples. Here we used a modified quaddRAD protocol to analyse the occurrence of index hopping  
19 and PCR chimeras in a series of experiments with up to a 100 multiplexed samples per sequenc-  
20 ing lane (total n = 639). We created two types of sequencing libraries: four libraries of Type A,  
21 where PCR reactions were run on individual samples before multiplexing, and three libraries of  
22 Type B, where PCRs were run on pooled samples. We used fixed pairs of inner barcodes to iden-  
23 tify chimeric reads. Type B libraries show a higher percentage of misassigned reads (1.15%)  
24 compared to Type A libraries (0.65%). We also quantify the commonly undetectable chimeric  
25 sequences that occur whenever multiplexed groups of samples with different outer barcodes are  
26 sequenced together on a single flow cell. Our results suggest that these types of chimeric se-  
27 quences represent up to 1.56% and 1.29% of reads in Type A and B libraries, respectively. We  
28 review the source of such errors, provide recommendations for developing highly-multiplexed  
29 RAD-seq protocols and analysing the resulting data to minimise the generation of chimeric se-  
30 quences, allow their quantification, and provide finer control over the number of PCR cycles  
31 necessary to generate enough input DNA for library preparation.

## 32 Key words

33 Chimeras, RAD-seq, quaddRAD, index hopping, read misassignment, adapters, barcodes

## 34 1 Introduction

35 Development of high-throughput sequencing and reduced representation approaches, such as  
36 restriction-site-associated DNA sequencing (RAD-seq), have dramatically reduced the cost of  
37 generating vast amounts of sequencing data. RAD-seq (Baird *et al.*, 2008) and its many variants,  
38 including but not limited to: ddRADseq (Peterson *et al.*, 2012), quaddRAD-seq (Franchini *et al.*,  
39 *et al.*, 2017) and adapterama (Glenn *et al.*, 2019; Bayona-Vásquez *et al.*, 2019) have been used  
40 in studies of phylogenetics (Massatti *et al.*, 2016; Lecaudey *et al.*, 2018; Near *et al.*, 2018),  
41 phylogeography (Jeffries *et al.*, 2016), association mapping (Nadeau *et al.*, 2014), introgression  
42 (Hohenlohe *et al.*, 2013), population structure and genetic diversity (Rodríguez-Ezpeleta *et al.*,  
43 2016; Leone *et al.*, 2019; Gao *et al.*, 2017; Martin Cerezo *et al.*, 2020).

44 Many high-throughput methods rely on multiplexing, inclusion of unique identifying se-  
45 quences in the adapters of each sample (barcodes or indices), pooling of samples, and subse-  
46 quently sequencing pools on a single sequencing lane. This approach has now become common  
47 practice, and single (Poland and Rife, 2012), dual (Glenn *et al.*, 2019; Peterson *et al.*, 2012)  
48 and quadruple barcodes (Franchini *et al.*, 2017; Bayona-Vásquez *et al.*, 2019) have been de-  
49 veloped. While these approaches greatly reduce the costs of sequencing, they can also increase  
50 the number of misassigned reads (MacConaill *et al.*, 2018), where sequences from one sample  
51 are incorrectly assigned to another due to sequencing errors, nucleotide misincorporations and  
52 contamination of adapters during synthesis or library preparation (Van Der Valk *et al.*, 2019),  
53 amongst others.

54 PCR chimeras are reads composed of distinct parental sequences, and are one source of  
55 read misidentification (Fonseca *et al.*, 2012). Spontaneous dissociation of polymerases from the  
56 template molecules during amplification can occur due to low processivity, secondary structures  
57 of DNA, or incomplete extension of DNA during the PCR (Smyth *et al.*, 2010), and can lead to  
58 the formation of incomplete sequences. These fragments can act as primers during subsequent  
59 amplification cycles, and produce artificial PCR products containing fragments of sequences  
60 containing barcodes from two different samples. Similarly, index hopping, caused by free-  
61 floating primers resulting from insufficient DNA purification, erroneous size selection of the  
62 library, or due to fragmentation during improper storage, can prime template DNA molecules on  
63 a sequencing flow cell prior to exclusion amplification (Van Der Valk *et al.*, 2019). The presence  
64 of both chimeric and index-hopped sequences can lead to inflated measures of diversity, and bias  
65 population genetics parameters in downstream analyses (Smyth *et al.*, 2010; Van Der Valk *et al.*,  
66 2019).

67 Additionally, chimeras can occur whenever a single flow cell is filled with groups of sam-  
68 ples that were processed independently but which share inner barcodes, such as in quaddRAD  
69 (Franchini *et al.*, 2017). In this case, the chimeric sequences are impossible to differentiate from  
70 genuine samples during downstream analysis. Only when unique combinations of both inner  
71 and outer barcoded adapters are used, can such chimeric reads be identified, quantified and  
72 eliminated during analysis. While PCR-free protocols for library preparation can alleviate the  
73 problem of read misassignment, studies have found considerable read misassignment in these

74 libraries (Costello *et al.*, 2018). Furthermore, they require a large amount of high-quality DNA,  
75 which is often not available.

76 The incidence of index-hopping during cluster generation of the Illumina HiSeq-X and No-  
77 vaSeq platforms has been reported as less than 1% (Van Der Valk *et al.*, 2019). However, the  
78 still widely used platforms utilising exclusion amplification (ExAmp) cluster generation such as  
79 the HiSeq 3000/4000 have reported misassignment rates up to 10% (Sinha *et al.*, 2017), and up  
80 to 30% in PCR reactions (Wang and Wang, 1996). We note, however, that published analyses  
81 of chimeric sequences were obtained on relatively few samples, and considered formation of  
82 chimeric sequences only during cluster generation or only during library preparation.

83 Here, we quantify the prevalence of chimeric sequences in two large-scale, highly multi-  
84 plexed experiments (86 to 100 samples multiplexed per lane of sequencing, total number of  
85 samples = 639). We assessed the contribution of both PCR amplification and sequencing to the  
86 generation of chimeric sequences, by preparing two types of libraries: Type A, where adapter  
87 ligation and PCR amplification was carried out on each sample individually, and Type B, where  
88 samples were pooled before amplification and addition of outer adapters, respectively. Our  
89 design also allows for identification of chimeric sequences that are otherwise undetectable: se-  
90 quences formed between groups of samples that share some combinations of inner adapters, but  
91 that were processed in different multiplexed groups (Figure 2, Step 2). Overall, we identify and  
92 quantify four types of chimeric sequences (Type I - IV, Figure 2, Step 3 and Methods 2.4). The  
93 details of the experimental design and illustration of the different types of chimeras are shown  
94 in Figure 2. Based on our findings, we provide recommendations for adapter design and data  
95 analysis to minimise the number of misassigned reads.

## 96 **2 Material and Methods**

### 97 **2.1 Adapter design**

98 Adapters were designed following the quaddRAD protocol (Franchini *et al.*, 2017). Restriction  
99 enzyme overhangs were modified for SbfI and MseI. 8bp-long barcodes were designed using  
100 EDITTAG (Faircloth and Glenn, 2012), with a minimum Levenshtein distance of 4 nucleotides,  
101 GC content of 40-60% and avoiding sequences that were self-complementary and containing  
102 more than two adjacent, identical bases. From 102 tags suggested by EDITTAG, sequences that  
103 reconstructed SbfI and MseI restriction sites were removed manually. 18 tags were selected for  
104 the inner adapters and 8 for the outer adapters, giving a total of 144 possible combinations.

105 Four random nucleotides (5'-VBBN-3') were also incorporated into the inner adapters to  
106 allow *in silico* identification of PCR duplicates (Figure 1). Inner adapters were used in fixed  
107 pairs while outer adapters have been used combinatorially. A complete list of adapter sequences  
108 can be found in Supplementary Materials Tables 1-3.

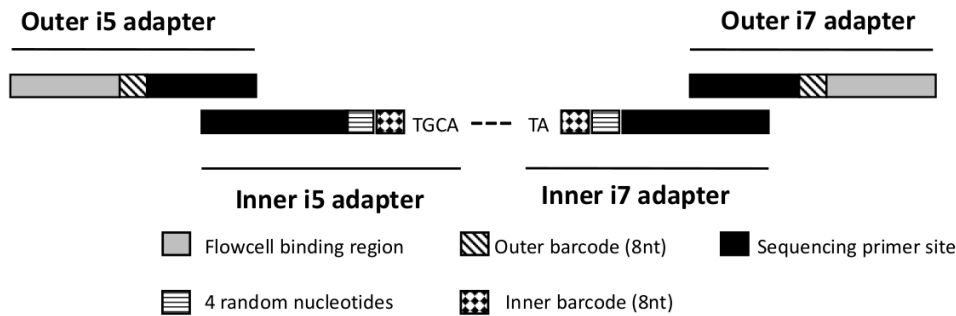

Figure 1: Elements of adapter sequences. Modified from Franchini *et al.* (2017)

## 2.2 Library preparation

DNA from 459 *Apodemus flavicollis* and 180 *Apodemus sylvaticus* tissue samples were extracted following Martin Cerezo *et al.* (2020). Seven libraries were prepared following a modified version of Franchini *et al.* (2017) protocol.

Four libraries (n = 164 *A. flavicollis* and 180 *A. sylvaticus*, 86 samples per library), henceforth called Type A, were prepared with each sample individually amplified to allow for the quantification of sequencing chimeras or index-hopped reads only. The three remaining libraries (n = 295 *A. flavicollis* samples including 96, 99 and 100 samples per library), henceforth called Type B, were multiplexed following restriction digestion and ligation of barcoded inner adapters before they were amplified as a pool. This allowed for the quantification of the total number of chimeric sequences, which originated both during sequencing and during PCR amplification.

### 2.2.1 Type A libraries: individual PCR reactions

Inner adapters were prepared by annealing each single-stranded oligonucleotide with its complementary strand. 5  $\mu$ l of each bottom and top strands at 100 $\mu$ M were mixed with 40  $\mu$ l of annealing buffer (50 mM NaCl, 10 mM Tris-Cl, pH 8.0), heated to 98 $^{\circ}$ C for 2.5 min and cooled at a rate of 1 $^{\circ}$ C per minute down to 15 $^{\circ}$ C. Once prepared, the adapters were kept at -20 $^{\circ}$ C and used within 2 weeks.

60 ng of genomic DNA was then digested and ligated to the inner adapters in a single-step 40  $\mu$ l reaction containing 4  $\mu$ l 10x CutSmart buffer, 1.5  $\mu$ l *MseI* (10 U/ $\mu$ L), 0.75  $\mu$ l *SbfI* (20 U/ $\mu$ L), 4  $\mu$ l ATP (10mM), 1  $\mu$ l T4 DNA ligase (400 U/ $\mu$ L), 0.75  $\mu$ l of each quaddRAD\_i5n and quaddRAD\_i7n inner adapters (10  $\mu$ M), ddH<sub>2</sub>O to 40  $\mu$ l and incubated for three hours at 30  $^{\circ}$ C in a thermocycler. The reaction was stopped with 10  $\mu$ l of 50 mM EDTA. Samples were purified and double size selected using 0.4x and 0.8x Sera-Mag SpeedBeads solution (Gelifesciences, Marlborough, MA, USA) containing 10 mM Tris base, 1 mM EDTA, 2.5 M NaCl, 20% PEG

134 8000 and 0.05% Tween 20 (pH 8.0), and eluted in 30  $\mu$ L 10mM Tris-HCl.

135 To introduce the outer barcoded adapters, an indexing PCR was carried out in a 50  $\mu$ L re-  
136 action containing 4  $\mu$ L of each i5 and i7 primers (5mM), 1  $\mu$ L of dNTPs (10 mM), 10.5  $\mu$ L of  
137 purified water, 10  $\mu$ L of 5x Q5-HF Buffer, 0.5  $\mu$ L of Q5-HF DNA Polymerase (New England  
138 Biolabs, Frankfurt am Main, Germany) and 20  $\mu$ L of template DNA. After an initial denatura-  
139 tion step of 30 seconds at 98°C, the PCR reaction was carried out in 14 cycles (15 seconds at  
140 98°C, 30 seconds at 67°C and 60 seconds at 72°C) and a final elongation at 72°C for 2 min-  
141 utes. Purification was performed using 0.8x Sera-Mag SpeedBeads solution (GElife- sciences,  
142 Marlborough, MA, USA) and DNA was eluted in 22  $\mu$ L Tris-HCl (10 mM).

143 Samples were multiplexed by combining 10 ng of each sample in Plates 1 and 4 and 20 ng of  
144 each samples in Plates 2 and 3. Libraries were then size-selected to 300-600 bp using BluePip-  
145 pin (Sage Science, Beverley, MA, USA) and sequenced on Illumina HiSeq 3000 (Illumina Inc.,  
146 San Diego, CA, USA).

## 147 **2.2.2 Type B libraries: multiplexed PCR reaction**

148 Digestion and ligation reactions were performed as described for Type A libraries, except with  
149 an initial input of 100 ng of genomic DNA. Samples were then purified using 0.8x SPRI Sera-  
150 Mag SpeedBeads solution, eluted in 30  $\mu$ L of Tris-HCl (10 mM) and subsequently equimolarly  
151 pooled according to inner barcode combinations prior to PCR amplification.

152 An indexing PCR was carried out to introduce the outer barcoded adapters to each pool of  
153 digested DNA and enrich the libraries in a 100  $\mu$ L reaction containing 8  $\mu$ L dNTP mix (2.5  
154 mM), 20  $\mu$ L 5x Q5-HF buffer, 4  $\mu$ L quaddRAD-i5nn primer (10  $\mu$ M), 4  $\mu$ L quaddRAD-i7nn  
155 primer (10  $\mu$ M), 1  $\mu$ L Q5 high-fidelity DNA polymerase (2 U/ $\mu$ L), 50 ng of DNA (restricted,  
156 ligated and pooled) and ddH<sub>2</sub>O to 100  $\mu$ L. Reaction conditions were as described for Type  
157 A libraries. Each PCR reaction was again purified using 0.8x SPRI Sera-Mag SpeedBeads  
158 solution and eluted in 50  $\mu$ L of tris-HCl (10 mM). 100 ng of each enriched library were then  
159 pooled again and size selected to 300-600 bp using Blue Pippin (Sage Science, Beverly, MA,  
160 USA) and sequenced on Illumina HiSeq 3000 (Illumina Inc., San Diego, CA, USA).

## 161 **2.3 Clone removal**

162 Sequences were demultiplexed based on the outer barcodes by the sequencing center (Genome  
163 Centre at the Max Planck Institute for Developmental Biology, Tübingen, Germany). PCR du-  
164 plicates were identified and removed from each library using the clone\_filter programme from  
165 Stacks 2.41 (Catchen *et al.*, 2011) and the random nucleotide tags in the inner adapters. Se-  
166 quences were then demultiplexed based on the inner barcodes, quality-filtered and truncated to  
167 136bp with process\_radtags, also from Stacks, removing reads with uncalled bases, low quality  
168 scores, reads that were marked by Illumina's chastity/purity filter as failing and allowing for  
169 barcode and RAD-tags rescue. process\_radtags was run 5 times, changing the number of mis-  
170 matches allowed for barcode rescue from 0 to 4 at each iteration. Samples were demultiplexed

171 using not only combinations of barcodes used for library preparation, but all the possible com-  
172 binations of inner barcodes, allowing for the quantification of chimeric sequences. The number  
173 of retained reads for each barcode combination and for each one of the process\_radtags runs  
174 were recovered from the log files generated by process\_radtags.

## 175 **2.4 Multiplexed groups**

176 multiplexed groups are defined as a set of samples that share outer adapters. Typically, several  
177 of such groups are prepared in parallel, pooled, and then sequenced on a single lane of a se-  
178 quencing machine. Each one of the four Type A libraries included 8 multiplexed groups of 9  
179 samples each, 1 multiplexed group of 8 samples and 1 multiplexed group with 6 samples. Type  
180 B libraries had different multiplexed schemes per library. The libraries contained 8 multiplexed  
181 groups of 9 samples and 3 multiplexed groups of 8 samples. Library Type B-1 also contained  
182 an additional multiplexed group with 4 samples while library Type B-2 contained a multiplexed  
183 group with 3 samples.

## 184 **2.5 Identification of chimeric sequences**

185 Based on the combination of inner and outer barcodes used, we divided the identified chimeric  
186 sequences into four types. Summary of the experimental design and the types of chimeric reads  
187 are shown on Figure 2.

188 Type I chimeras are molecules that contain unused combinations of inner barcodes, both of  
189 which were used in the same multiplexed group. For example, inner barcodes "A", "a", "B" and  
190 "b" were present in multiplexed group 1, but not in a combination "Ab".

191 Chimeras of Types II-IV form between sequences from different multiplexed groups and  
192 are only detectable if multiplexed groups contain different number of combinations of inner  
193 barcodes. For example, multiplexed group 1 contains 4 combinations of inner barcodes (Aa,  
194 Bb, Cc, Dd) but multiplexed group 2 contains only 2 (Aa, Bb). These chimeras are detectable  
195 when samples are processed in several unequally-sized groups but the same set of inner barcodes  
196 is used across all groups.

197 Type II chimeras are reads containing one inner barcode that was used in a different multi-  
198 plexed group. For example, the combination of inner barcodes "Bc" in multiplexed group 2 is a  
199 chimera type II since this multiplexed group contains barcode "B" but not barcode "c".

200 Type III chimeras are reads containing a *chimeric* combination of inner barcodes, neither  
201 of which was used in their multiplexed group. An example of these type of chimeras is the  
202 combination of inner barcodes "Cd" in multiplexed group 2, since this multiplexed group does  
203 not contain neither barcodes "C" nor "d". Barcode "C" was used in multiplexed group 1 and  
204 barcode "d" in multiplexed group 3.

205 Finally, Type IV chimeras are reads containing a correct combination of inner barcodes that  
206 were used in other multiplexed groups but not in the group where they were detected. The  
207 combination "Dd" in multiplexed group 2 is one of these chimeras since multiplexed group 2

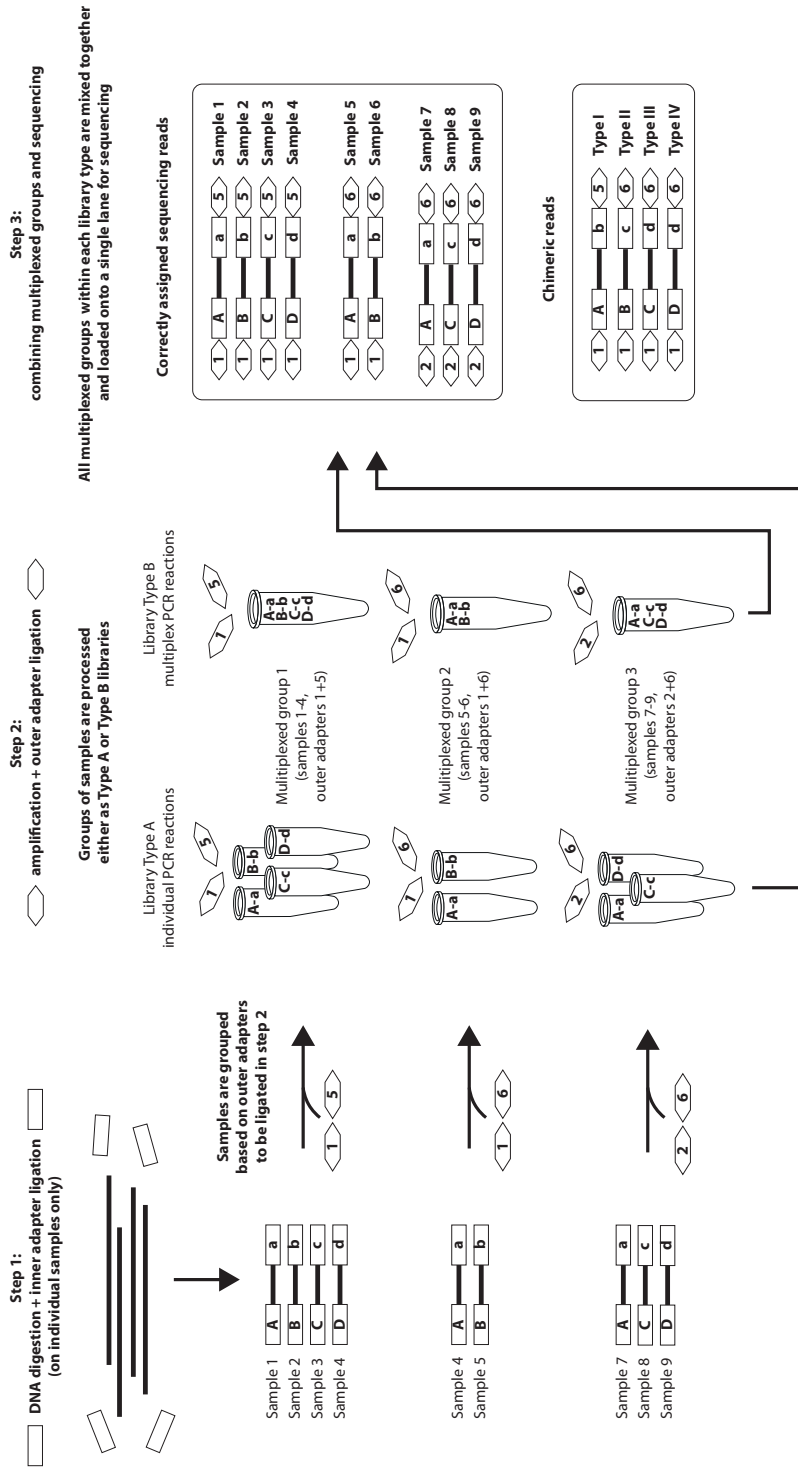

Figure 2: Summary of the experimental design and the types of chimeric reads. Inner adapters are represented by letters and rectangles while outer adapters are represented by numbers and hexagons. Combinations of the same uppercase and lowercase letters represent the unique combinations of inner barcoded adapters used in the protocol. Any other combination of letters represent chimeric combinations of adapters. Multiplexed groups are groups of samples processed together in the protocol.

208 does not contain barcodes "D" nor "d" but this combination of barcodes was used in multiplexed  
209 groups 1 and 3. In our protocol, it was only possible to detect Type IV chimeras in 19 out of 75  
210 multiplexed groups as all other groups were equally-sized.

## 211 **2.6 Counts of sequences with chimeric adapters**

212 For each multiplexed group, unused combinations of barcodes were used to detect chimeric  
213 sequences and were quantified as a percentage of total sequences within the multiplexed group.  
214 Each of the multiplexed groups included between 2 and 9 samples. We calculated percentage of  
215 chimeric sequences in relation to mismatches allowed for barcode rescue and the library type.  
216 This allowed comparison of the proportion of chimeras when different number of mismatches  
217 were allowed, as well as comparison of the results within and between each library type.

218 To compare the relative abundance of the different types of chimeras, the percentage of  
219 chimeric sequences of each type was calculated relative to the number of reads per plate se-  
220 quenced. Similarly, the percentage of chimeric sequences was also calculated individually for  
221 each possible chimeric combination of barcodes.

222 Type IV chimeras can only be identified in very specific multiplexing schemes and bar-  
223 codes combinations, but it is worth emphasising that they are being generated in all multiplexed  
224 groups, whether or not the experimental protocol enables their detection. We can directly quan-  
225 tify a fraction of Type IV chimeras in 19 of our 75 multiplexed groups, but we expect that in  
226 other multiplexed groups or combinations of barcodes Type IV chimeras represent a similar  
227 percentage of missassigned reads. We estimated the number of Type IV chimeras, including  
228 their generation between all possible combinations of adapters that could produce them, with  
229 the following formula:

$$est\_chimIV = \frac{\frac{obs\_chimIV}{total\_mg\_reads} \times total\_reads}{\frac{pos\_chimIV}{total\_chimIV}}$$

230 Where:

231 `obs_chimIV`: Number of observed type IV chimeras

232 `total_mg_reads`: Number of reads in multiplexed groups with observed type IV chimeras

233 `pos_chimIV`: Total number of cases that could produce chimeras type IV

234 `total_chimIV`: Number of cases where chimeras type IV were identified

235 `total_reads`: Total number of reads

236

237 Calculations were performed only considering 0 mismatches for barcode rescue.



## 3 Results

### 3.1 Multiplex PCR increases the proportion of sequences with chimeric adapters

Type A libraries, where indexing PCRs were conducted on each sample independently, consistently produced fewer chimeric sequences, as a percentage of total sequences, than Type B libraries, at the same number of mismatches during barcode rescue (Figure 3). Overall, demultiplexing with perfect barcodes showed a median of 0.59% (max = 1.20%, min = 0.33%, mean = 0.65%) and 1.09% (max = 2.33%, min = 0.31%, mean = 1.15%) chimeric sequences for Type A and Type B libraries, respectively.

Increasing the number of mismatches for barcode rescue from zero to four also increased the percentage of chimeric sequences detected in both library types to a median of 4.12% (max=7.03, min=2.43, mean = 4.37%) for Type A and 8.31% (max=11.90, min=3.96, mean = 7.85%) for Type B, as a greater number of reads was retained by process\_radtags. In all cases, differences between Type A and Type B libraries were significant (Figure 3, Mann Whitney U test,  $p < 0.001$ ).

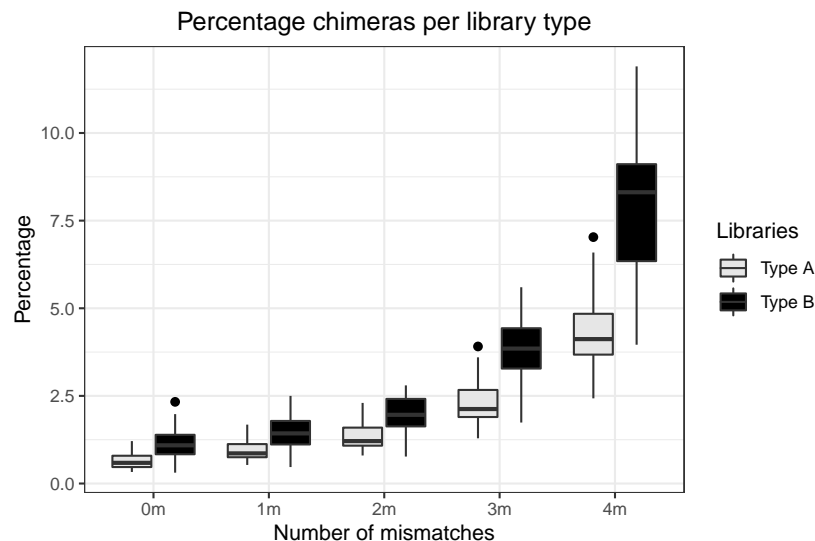

Figure 3: Percentage of chimeric sequences in Type A (grey; PCR on individual samples: includes only sequencing chimeras) and Type B libraries (black, PCR on multiplexed groups of samples, includes PCR and sequencing chimeras) for each level of barcode rescue.

### 253 3.2 Differences in percentage of chimeric sequences within Type A or 254 Type B libraries are smaller than between the two libraries

255 Percentage of chimeric sequences within independently prepared libraries of the same type  
256 (four libraries of Type A and three of Type B) were more similar to one another than between  
257 libraries of different type (Figure 4). The only differences between libraries of the same type  
258 were between Type A-4 vs Type A-1 and Type A-4 vs Type A-3 ( $H_3 = 13.3$ ,  $p = 0.004$ , post-hoc  
259 Dunn test). No other differences were detected between any other of combination libraries.

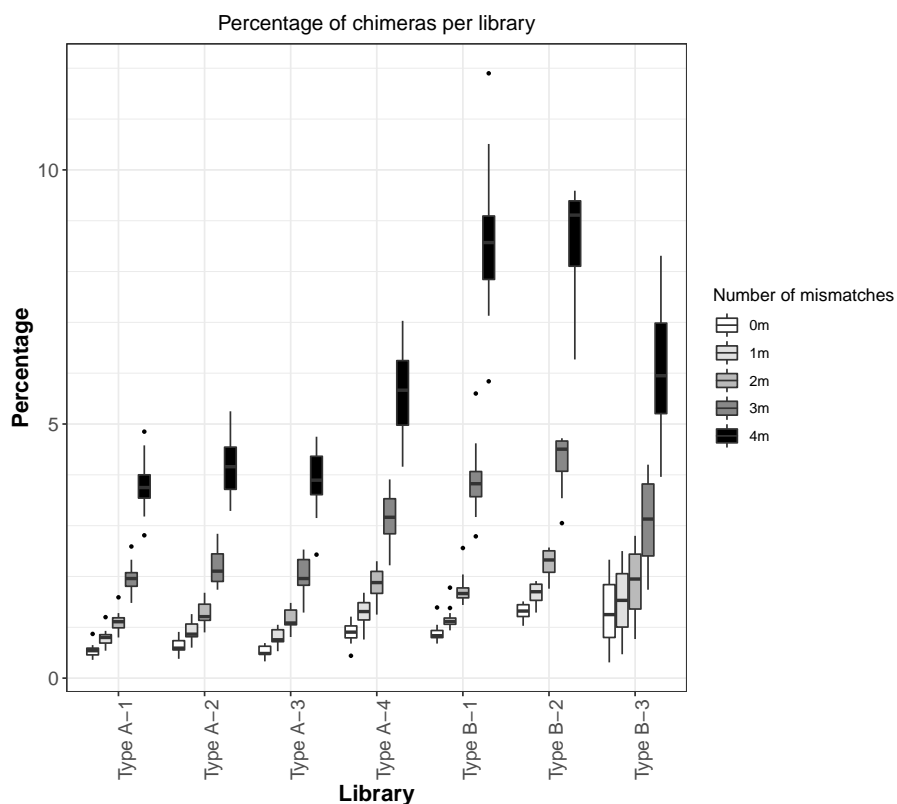

Figure 4: Percentage of chimeric sequences in independently prepared libraries of Type A and Type B for each level of barcode rescue.

### 260 3.3 The proportion of chimeric sequences increases with the number of 261 mismatches allowed in barcode rescue

262 Allowing mismatches for barcode rescue enables recovery of sequences with uncalled or er-  
263 roneous base calls in the barcode sequence. Therefore, any increment in the number of mis-  
264 smatches will increase the number of reads retained after demultiplexing with process\_radtags.  
265 It will also increase the proportion of chimeric sequences.

266 The overall proportion of such sequences increased significantly with each increment in the  
267 number of mismatches allowed for barcode rescue, from 0 to 4 (Kruskal-Wallis test:  $H_4 = 287$ ,  
268  $p < 0.001$ ). The closer the number of mismatches is to the distance between barcodes (in our  
269 case, 4 nucleotides), the larger the increase in the proportion of chimeric sequences (Figure 5 ).

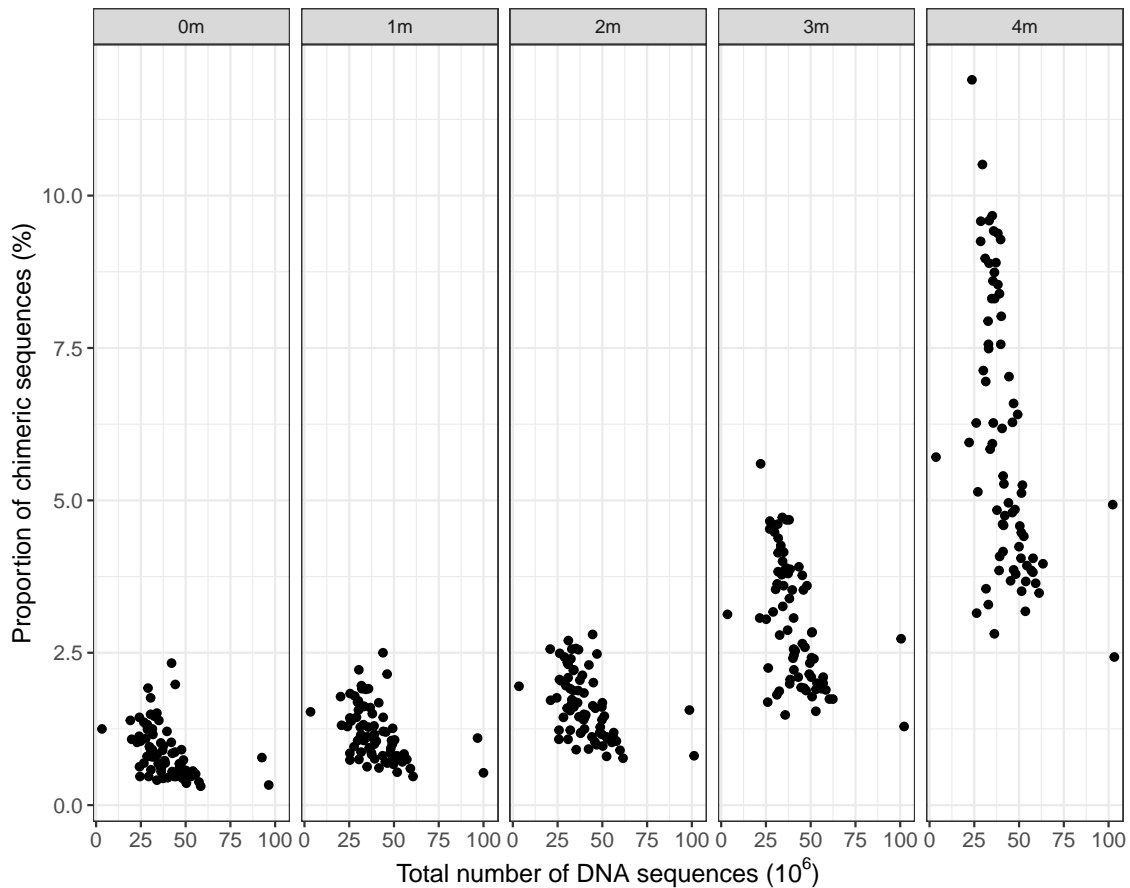

Figure 5: Percentage of chimeric sequences in total number of DNA sequences recovered from both library types for each level of barcode rescue.

270 Importantly, the number of new reads retained during demultiplexing remain higher than the  
271 number of new chimeric sequences detected by process\_radtags when we increase the number  
272 of mismatches for barcode rescue up to three (Figure 6). Past this point, when the number  
273 of mismatches equals the distance between barcodes, the number of new chimeric sequences  
274 detected overtakes the number of new retained reads, indicating that increasing the number of  
275 mismatches past three has no additional benefit.

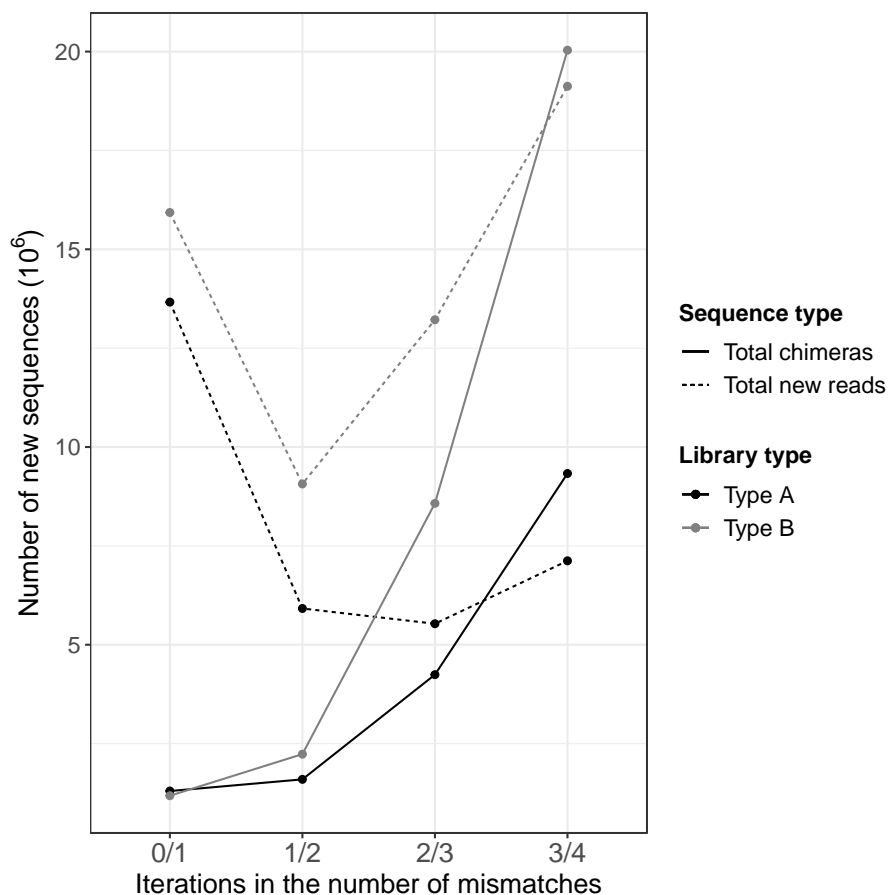

Figure 6: Number of new sequences obtained for each iteration on the number of mismatches allowed for barcode rescue. Solid lines represent the new chimeric sequences while dashed lines represent the total number of new reads. Colour indicates library type (Black: Type A, Grey: Type B)

### 3.4 Quantification of different types of chimeric sequences

When the multiplexed groups are equally-sized, containing 9 samples, among all possible combinations of inner barcodes ( $n = 81$ ), 11,1% identify genuine reads while the remaining 88,9% identify chimeric sequences. In these cases, 56 out 75 multiplexed groups, only chimeras Type I are detectable. Since chimeras type II-IV are only detectable in a much smaller fraction of multiplexed groups, chimeras type I seem to be the predominant fraction of chimeras per library type (Figure 7). When only chimeras type I are detectable, chimeras type II and III will be identified as chimeras type I while chimeras type IV will be misidentified as genuine samples.

In multiplexed groups where the number of multiplexed samples was lower than 9, it is possible to identify chimeras Type II, III and IV. In these cases, 19 out of the 75 multiplexed groups in our protocol, chimeras type IV are the most abundant chimeras when less than 3

287 mismatches were allowed for barcode rescue (Figure 8).

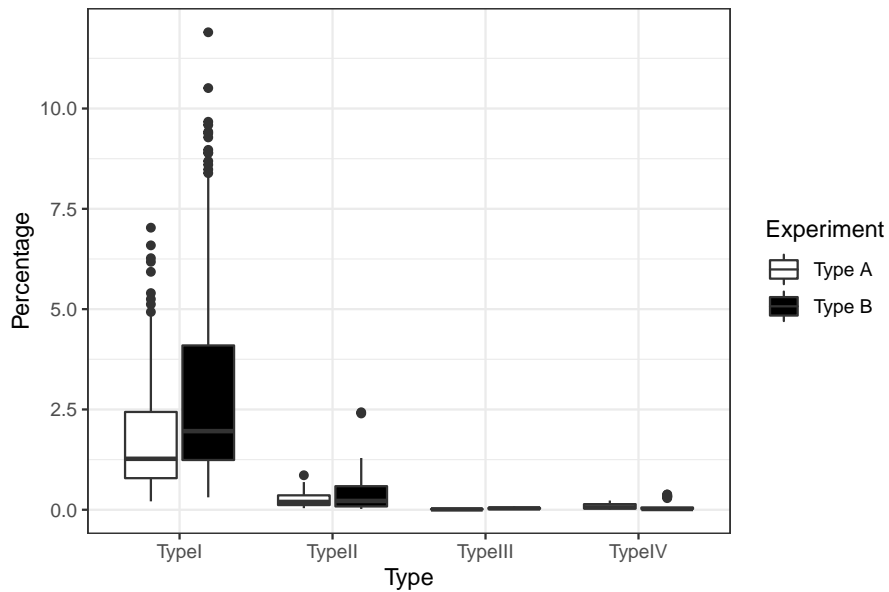

Figure 7: Percentage of chimeric sequences in each library type, relative to the total number of reads per plate sequenced.

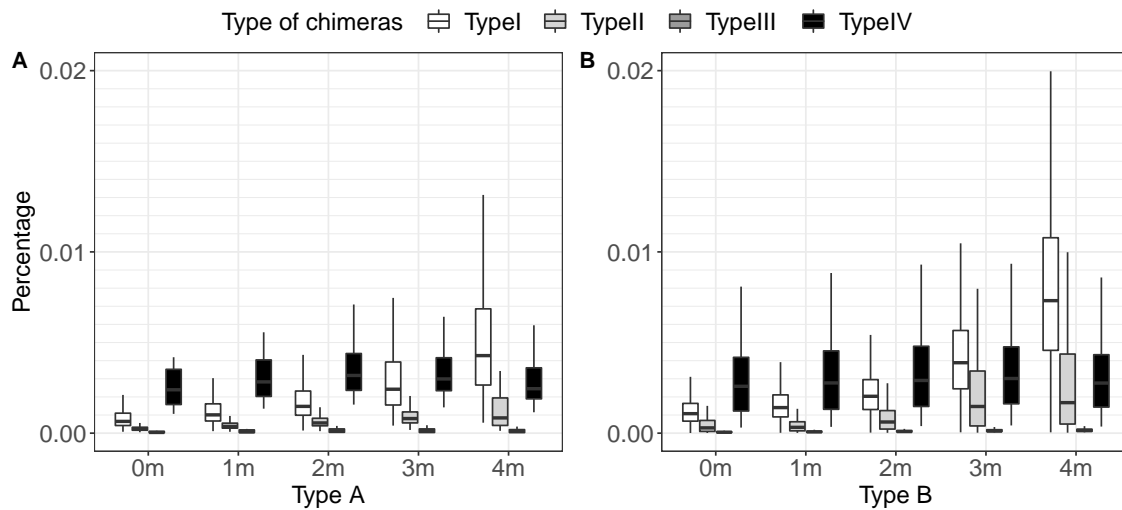

Figure 8: Percentages of four different types of chimeras in each library type. Percentages have been calculated individually for each combination of barcodes.

288 As it was only possible to detect Type IV chimeras in 19 out of the 75 multiplexed groups,  
289 we estimated the expected total number of Type IV chimeras should the protocol had been

290 constructed to detect all the Type IV chimeras. In Type A libraries, 182768 type IV chimeras  
291 (0.01% of the total reads from the library) were observed, while the estimated number of type  
292 IV chimeras is 28280095 reads (1.56% of the total reads in the library). In Type B libraries, we  
293 observed 205518 type IV chimeras (0.019% of the total number of reads in the library) of the  
294 estimated 13713202 reads (1.29% of the total number of reads in the library).

## 295 4 Discussion

296 High multiplexed approaches for reduced representation libraries such as RAD-seq have con-  
297 siderably reduced the cost of genotyping of hundreds of samples (Bayona-Vázquez *et al.*, 2019;  
298 Franchini *et al.*, 2017). However, library preparation methods introduce a number of artefacts  
299 that must be considered when designing a RAD-seq study and its analysis (Andrews *et al.*,  
300 2016). The formation of sequences with chimeric adapters, particularly the ones produced by  
301 index hopping, is one of such artefacts, which a number of previous studies have attempted to  
302 quantify (MacConaill *et al.*, 2018; Van Der Valk *et al.*, 2019; Costello *et al.*, 2018).

303 Here, we extend these analyses to a much larger (total  $n = 639$ ) and highly multiplexed  
304 experiment (86 to 100 samples multiplexed), such that has now become common in ecolog-  
305 ical and evolutionary genomics research. Additionally, we consider variation in the library  
306 preparation protocol that affect the proportions of chimeric sequences by analysing chimeric  
307 sequences formed during both sequencing only and during indexing PCR and amplification  
308 during sequencing combined. Finally, we assess the effects of barcode rescue on the propor-  
309 tion of chimeric reads identified and quantify specific types of chimeric sequences (types II-IV)  
310 that are impossible to detect in a typical experiment with the same number of samples in every  
311 multiplexed group. As our model system *Apodemus spp* does not have the reference genome  
312 available, we were not able to identify intra-individual chimeras: chimeric sequences produced  
313 between different sequences from the same individual. Such sequences can typically be re-  
314 moved from downstream analysis by mapping to a reference genome.

315 Overall, we show that the proportion of chimeric sequences is generally low for type A li-  
316 braries: mean=0.65%, median=0.59%, stdev=0.21. Pooling samples early in the protocol (prior  
317 to the indexing PCR, as in our type B libraries) roughly doubles the proportion of detectable  
318 chimeric sequences: mean=1.15%, median=1.09%, stdev=0.43, thus increasing read misassign-  
319 ment.

320 We also show that this proportion is relatively stable throughout several sequencing runs  
321 (Supplementary Materials Table 4, 4). In our case, more chimeric sequences identified in li-  
322 brary type A-4 have likely arisen due to inclusion of degraded DNA samples. As read length  
323 negatively correlates with the frequency of index hopping in a sequencing library (Van Der  
324 Valk *et al.*, 2019), it could explain the greater proportion of chimeric reads in type A-4 library  
325 compared to other runs of libraries of type A.

326 Previous studies (Van Der Valk *et al.*, 2019) have identified similar percentages of chimeric  
327 reads - 0.47% - to those obtained in our type A libraries, in a similar protocol that eliminated the

328 possibility of generating chimeras at the indexing PCR stage. In other works, higher proportions  
329 of chimeric reads were reported, including in the PCR-free protocols (1.5%, (Ros-Freixedes *et*  
330 *al.*, 2018)), Illumina Guidelines (2%, (Illumina, 2017)) or 1.2% in a study by Costello *et al.*  
331 (2018). The latter study explained their proportions by low yield of the libraries and a high  
332 proportion of free-floating primers on the flow cell.

333 Our experimental design, with all barcodes separated by 4 nucleotides to minimise read mis-  
334 assignment due to sequencing errors, demonstrated that increasing the number of allowed mis-  
335 matches during barcode rescue in a demultiplexing step increases the proportion of chimeric se-  
336 quences by as much as 10 fold (Figure 3). Our data shows that allowing more than 2 nucleotides  
337 difference in barcode rescue results in extremely high proportion of chimeric sequences, to the  
338 point where they become more prevalent in the data than the increase in the number of retained  
339 reads due to barcode rescue.

340 Our results indicate that chimeras type I are the most frequent type of chimeras (0.617%  
341 and 1.082% of the total reads for libraries of Type A and Type B respectively), having in mind  
342 that our protocol was dominated by equally-sized multiplexed groups. Although the frequency  
343 of non-Type I chimeric sequences detected in our protocol is much lower (0.101%, 0.005% and  
344 0.07%, of the total reads for chimeras Type II, III and IV in libraries Type A; 0.112%, 0.02%  
345 and 0.072%, of the total reads for chimeras of Type II, III and IV in libraries Type B), most  
346 chimeras of Type IV are undetectable in our protocol. If our protocol allowed for detection  
347 of all Type IV chimeras, we estimate that they would constitute a 100-fold larger fraction of  
348 chimeric sequences.

349 Therefore, the principal issue with Type IV chimeras is that they are misassigned as genuine  
350 samples and they are impossible to detect in the analysis pipeline when multiplexed groups are  
351 of the same size. Chimeras Type II and III, in contrast, are routinely classified as chimeras Type  
352 I in RAD-seq protocols with equally-sized multiplexed groups and therefore can be removed  
353 during the analysis. It is overall, however, difficult to assess the impact of chimeric sequences  
354 on downstream analyses and simulations would be needed to estimate the effects of chimeric  
355 sequences incorporated into the final genotypes. Nevertheless, we can suggest steps that would  
356 minimise their impact in any highly-multiplex RAD-seq experiment.

357 In experimental designs where costs are less constrained, we would recommend use of fixed  
358 pairs of inner and outer adapters for each sample and multiplexed groups, respectively. Al-  
359 though this increases the cost associated with development and adapter synthesis, fixed pairs  
360 of barcodes will minimise the probability of biasing downstream analyses due to read misas-  
361 signment (Van Der Valk *et al.*, 2019). We would also recommend performing indexing PCRs  
362 on each sample individually. PCR duplicates might have little effect on genotype calls (Euclide  
363 *et al.*, 2020), however, we still recommend the inclusion of a random nucleotides to identify  
364 them. The major benefit of being able to identify PCR duplicates and chimeras is the ability to  
365 increase the number of PCR cycles in the samples' amplification step, increasing the amount of  
366 input material available. In cases where the input materials is scarce and/or degraded, control-  
367 ling for chimeric sequences becomes more important, as their proportion increases with shorter  
368 read length and increasing number of mismatches allowed during barcode rescue.

369 When costs are a limiting factor, we suggest adopting a hybrid approach, similar to the  
370 one described here: use of fixed pairs of inner barcodes only and pooling the samples for the  
371 indexing PCR. This approach still enables adequate control of the chimeric sequences in the  
372 data, while saving costs during library preparation. Nevertheless when using this approach, one  
373 should consider not including all combination of inner barcodes in every multiplexed group to  
374 be able to estimate the frequency of chimeras type IV that are being misassigned to genuine  
375 samples.

## 376 **5 Acknowledgements**

377 The authors wish to thank all collaborators that have contributed samples used in this project  
378 (in alphabetical order): Dr Jan Boratyński, Mammal Research Institute, Polish Academy of  
379 Sciences, Białowieża, Poland, Dr Dougie Clarke, University of Huddersfield, UK, Dr Jerry  
380 Herman, National Museums Scotland, Edinburgh, UK, Dr Vladimir Jovanovic, Freie Univer-  
381 sität Berlin, Germany, Dr Johan Michaux, University of Liège, Belgium, Dr Joana Pauperio,  
382 CIBIO, University of Porto, Portugal and Dr Karol Zub, Mammal Research Institute Polish  
383 Academy of Sciences, Białowieża, Poland. MLMC, RR and JB also wish to acknowledge the  
384 use of the Orion High Performance Computing cluster at the University of Huddersfield.

## 385 **6 Data Accessibility**

386 All the code and the demultiplexing information produced by process\_radtags, as well as the  
387 tables constructed used to perform all the analyses described here are available on GitHub:  
388 [https://github.com/Marisa89/chimeric\\_adapters](https://github.com/Marisa89/chimeric_adapters). The data from Type A li-  
389 braries is available in EBI SRA repository under accession number PRJNA554851. The data  
390 from Type B libraries will be made available upon acceptance of the manuscript.

## 391 **7 Funding**

392 This work was supported by the University of Huddersfield, the Friedrich Miescher Laboratory  
393 of the Max Planck Society and the Microsoft Azure for Research grant awarded to MLMC and  
394 JB.

## 395 **References**

396 Andrews, K.R., Good, J.M., Miller, M.R., Luikart, G., and Hohenlohe, P.A. (2016). “Harness-  
397 ing the power of RADseq for ecological and evolutionary genomics”. In: *Nature Reviews*  
398 *Genetics* 17.2, p. 81.



- 399 Baird, Nathan A, Etter, Paul D, Atwood, Tressa S, Currey, Mark C, Shiver, Anthony L, Lewis,  
400 Zachary A, Selker, Eric U, Cresko, William A, and Johnson, Eric A (2008). “Rapid SNP  
401 discovery and genetic mapping using sequenced RAD markers”. In: *PloS one* 3.10, e3376.
- 402 Bayona-Vásquez, N.J., Glenn, T.C., Kieran, T.J., Pierson, T.W., Hoffberg, S.L., Scott, P.A.,  
403 Bentley, K.E., Finger, J.W., Louha, S., Troendle, N., Diaz-Jaimes, P., Mauricio, R., and  
404 Faircloth, B.C. (2019). “Adapterama III: Quadruple-indexed, double/triple-enzyme RAD-  
405 seq libraries (2RAD/3RAD)”. In: *PeerJ* 7, e7724.
- 406 Catchen, J.M., Amores, A., Hohenlohe, P., Cresko, W., and Postlethwait, J.H. (2011). “Stacks:  
407 building and genotyping loci de novo from short-read sequences”. In: *G3: Genes, genomes,  
408 genetics* 1.3, pp. 171–182.
- 409 Costello, M., Fleharty, M., Abreu, J., Farjoun, Y.i, Ferriera, S., Holmes, L., Granger, B., Green,  
410 L., Howd, T., Mason, T., Vicente, G., Dasilva, M., Brodeur, W., DeSmet, T., Dodge, S.,  
411 Lennon, N.J., and Gabriel, S. (2018). “Characterization and remediation of sample index  
412 swaps by non-redundant dual indexing on massively parallel sequencing platforms”. In:  
413 *BMC genomics* 19.332.
- 414 Euclide, Peter T, McKinney, Garrett J, Bootsma, Matthew, Tarsa, Charlene, Meek, Mariah H,  
415 and Larson, Wesley A (2020). “Attack of the PCR clones: Rates of clonality have little effect  
416 on RAD-seq genotype calls”. In: *Molecular ecology resources* 20.1, pp. 66–78.
- 417 Faircloth, B.C. and Glenn, T.C. (2012). “Not all sequence tags are created equal: designing and  
418 validating sequence identification tags robust to indels”. In: *PloS one* 7.8, e42543.
- 419 Fonseca, V.G, Nichols, B., Lallias, D., Quince, C., Carvalho, G.R., Power, D.M., and Creer,  
420 S. (2012). “Sample richness and genetic diversity as drivers of chimera formation in nSSU  
421 metagenetic analyses”. In: *Nucleic Acids Research* 40.9, e66–e66.
- 422 Franchini, P., Monné Parera, D., Kautt, A.F., and Meyer, A. (2017). “quaddRAD: a new high-  
423 multiplexing and PCR duplicate removal ddRAD protocol produces novel evolutionary in-  
424 sights in a nonradiating cichlid lineage”. In: *Molecular Ecology* 26.10, pp. 2783–2795.
- 425 Gao, Y., Yin, S., Wu, L., Dai, D., Wang, H., Liu, C., and Tang, L. (2017). “Genetic diversity and  
426 structure of wild and cultivated *Amorphophallus paeoniifolius* populations in southwestern  
427 China as revealed by RAD-seq”. In: *Scientific reports* 7.1, pp. 1–10.
- 428 Glenn, T.C., Nilsen, R.A., Kieran, T.J., Sanders, J.G., Bayona-Vásquez, N. J, Finger, J.W., Pier-  
429 son, T.W., Bentley, K.E., Hoffberg, S.L., Louha, S., García-De León, F.J., Del Río-Portilla,  
430 M.A., Reed, K.D., Anderson, J.L., Meece, J.K., Aggrey, S.E., Rekaya, R., Alabady, M.,  
431 Bélanger, M., Winker, K., and Faircloth, B.C. (2019). “Adapterama I: universal stubs and  
432 primers for 384 unique dual-indexed or 147,456 combinatorially-indexed Illumina libraries  
433 (iTru & iNext)”. In: *PeerJ* 7, e7755.
- 434 Hohenlohe, P.A., Day, M.D., Amish, S.J., Miller, M.R., Kamps-Hughes, N., Boyer, M.C., Muhlfeld,  
435 C.C., Allendorf, F.W., Johnson, E.A., and Luikart, G. (2013). “Genomic patterns of intro-  
436 gression in rainbow and westslope cutthroat trout illuminated by overlapping paired-end  
437 RAD sequencing”. In: *Molecular ecology* 22.11, pp. 3002–3013.
- 438 Illumina (2017). “Effects of index misassignment on multiplexing and downstream analysis”.  
439 In: URL: <https://www.illumina.com/content/dam/illumina-marketing/>

- 440 documents / products / whitepapers / index - hopping - white - paper -  
441 770-2017-004.pdf.
- 442 Jeffries, D.L., Copp, G.H., Lawson Handley, L., Olsén, K.H., Sayer, C.D., and Hänfling, B.  
443 (2016). “Comparing RADseq and microsatellites to infer complex phylogeographic pat-  
444 terns, an empirical perspective in the Crucian carp, *Carassius carassius*, L.” In: *Molecular*  
445 *ecology* 25.13, pp. 2997–3018.
- 446 Lecaudey, L.A., Schliewen, U.K., Osinov, A.G., Taylor, E.B., Bernatchez, L., and Weiss, S.J.  
447 (2018). “Inferring phylogenetic structure, hybridization and divergence times within Salmoni-  
448 nae (Teleostei: Salmonidae) using RAD-sequencing”. In: *Molecular phylogenetics and evo-*  
449 *lution* 124, pp. 82–99.
- 450 Leone, A., Álvarez, P., García, D., Saborido-Rey, F., and Rodríguez-Ezpeleta, N. (2019). “Genome-  
451 wide SNP based population structure in European hake reveals the need for harmonizing  
452 biological and management units”. In: *ICES Journal of Marine Science* 76.7, pp. 2260–  
453 2266.
- 454 MacConaill, L.E., Burns, R.T., Nag, A., Coleman, H. A., Slevin, M.K., Giorda, K., Light, M.,  
455 Lai, K., Jarosz, M., McNeill, M.S., Ducar, M.D., Meyerson, M., and Thorner, A.R. (2018).  
456 “Unique, dual-indexed sequencing adapters with UMIs effectively eliminate index cross-  
457 talk and significantly improve sensitivity of massively parallel sequencing”. In: *BMC ge-*  
458 *nomics* 19.30.
- 459 Martin Cerezo, M.L., Kucka, M., Zub, K., Chan, Y.F., and Bryk, J. (2020). “Population structure  
460 of *Apodemus flavicollis* and comparison to *Apodemus sylvaticus* in northern Poland based  
461 on RAD-seq”. In: *BMC genomics* 21.241.
- 462 Massatti, R., Reznicek, A. A., and Knowles, L.L. (2016). “Utilizing RADseq data for phyloge-  
463 netic analysis of challenging taxonomic groups: A case study in *Carex* sect. *Racemosae*”.  
464 In: *American Journal of Botany* 103.2, pp. 337–347.
- 465 Nadeau, N.J., Ruiz, M., Salazar, P., Counterman, B., Medina, J.A, Ortiz-Zuazaga, H., Morrison,  
466 A., McMillan, W.O., Jiggins, C.D., and Papa, R. (2014). “Population genomics of parallel  
467 hybrid zones in the mimetic butterflies, *H. melpomene* and *H. erato*”. In: *Genome research*  
468 24.8, pp. 1316–1333.
- 469 Near, T.J., MacGuigan, D.J., Parker, E., Struthers, C.D., Jones, C.D., and Dornburg, A. (2018).  
470 “Phylogenetic analysis of Antarctic notothenioids illuminates the utility of RADseq for  
471 resolving Cenozoic adaptive radiations”. In: *Molecular phylogenetics and evolution* 129,  
472 pp. 268–279.
- 473 Peterson, B.K., Weber, J.N., Kay, E.H., Fisher, H.S., and Hoekstra, H.E. (2012). “Double digest  
474 RADseq: an inexpensive method for de novo SNP discovery and genotyping in model and  
475 non-model species”. In: *PloS one* 7.5, e37135.
- 476 Poland, J.A. and Rife, T.W. (2012). “Genotyping-by-sequencing for plant breeding and genet-  
477 ics”. In: *The Plant Genome* 5.3, pp. 92–102.
- 478 Rodríguez-Ezpeleta, N., Bradbury, I.R., Mendibil, I., Álvarez, P., Cotano, U., and Irigoien, X.  
479 (2016). “Population structure of Atlantic mackerel inferred from RAD-seq-derived SNP

- 480 markers: Effects of sequence clustering parameters and hierarchical SNP selection”. In:  
481 *Molecular ecology resources* 16.4, pp. 991–1001.
- 482 Ros-Freixedes, R., Battagin, M., Johnsson, M., Gorjanc, G., Mileham, A.J., Rounsley, S.D.,  
483 and Hickey, J.M. (2018). “Impact of index hopping and bias towards the reference allele on  
484 accuracy of genotype calls from low-coverage sequencing”. In: *Genetics Selection Evolution*  
485 50.1, p. 64.
- 486 Sinha, R., Stanley, G., Gulati, G.S., Ezran, C., Travaglini, K.J., Wei, E., Chan, C.K.F., Nabhan,  
487 A.N., Su, T., Morganti, R.M., Conley, S.D., Chaib, H., Red-horse, K., Longaker, M.T., Sny-  
488 der, M.P., and Krasnow M.A. and Weissman, I.L. (2017). “Index switching causes “spreading-  
489 of-signal” among multiplexed samples in Illumina HiSeq 4000 DNA sequencing”. In: *BioRxiv*,  
490 p. 125724.
- 491 Smyth, R.P, Schlub, T.E, Grimm, A, Venturi, V., Chopra, A., Mallal, S., Davenport, M.P, and  
492 Mak, J. (2010). “Reducing chimera formation during PCR amplification to ensure accurate  
493 genotyping”. In: *Gene* 469.1-2, pp. 45–51.
- 494 Van Der Valk, T., Vezzi, F., Ormestad, M., Dalen, L., and Guschanski, K. (2019). “Index hop-  
495 ping on the Illumina HiseqX platform and its consequences for ancient DNA studies”. In:  
496 *Molecular ecology resources*.
- 497 Wang, G.C.Y. and Wang, Y. (1996). “The frequency of chimeric molecules as a consequence of  
498 PCR co-amplification of 16S rRNA genes from different bacterial species”. In: *Microbiol-  
499 ogy* 142.5, pp. 1107–1114.
